# Supplementary material for: Different Relations of Religion and Mental Health
Source: Atypon-hosted journal article supplement (doi:10.1027/2512-8442/a000100), 2022-01-01
Supplement: 2512-8442_a000100_esm1.pdf [file 2512-8442_a000100_esm1.pdf]

**Electronic Supplement**

**Different Relations of Religion and Mental Health:  
Comparing Middle Eastern Muslim Refugee and Immigrant Adolescents**

EL-Awad, U. \*, Fathi, A., Lohaus, A., Petermann, F. & Reinelt, T.

#####

- 1. Table S1**
- 2. Table S2**
- 3. Table S3**
- 4. Figure S1**
- 5. Figure S2**
- 6. Figure S3**
- 7. Measurement Invariance**

#####

*Group-specific Differences regarding the Moderation Effect of Religiosity on the Relationship between Potentially Traumatic Events and Internalizing Symptoms*

| Predictor        | <i>b</i> | CI <sub>95%</sub> for <i>b</i> <sup>a</sup> |       | <i>SE</i> <sup>a</sup> | <i>t</i> | <i>p</i> |
|------------------|----------|---------------------------------------------|-------|------------------------|----------|----------|
|                  |          | Lower                                       | Upper |                        |          |          |
| Age              | -0.26    | -1.54                                       | 1.03  | 0.65                   | -0.40    | .690     |
| RE               | -3.27    | -5.98                                       | -0.56 | 1.37                   | -2.38    | .018     |
| PTE              | 1.97     | 1.14                                        | 2.74  | 0.38                   | 5.17     | < .001   |
| Group            | -1.04    | -5.69                                       | 3.60  | 2.35                   | -0.45    | .657     |
| PTE x RE         | -0.15    | -1.02                                       | 0.73  | 0.44                   | -0.34    | .738     |
| PTE x Group      | 1.09     | -0.44                                       | 2.63  | 0.78                   | 1.41     | .161     |
| RE x Group       | 1.05     | -4.31                                       | 6.40  | 2.70                   | 0.39     | .700     |
| PTE x RE x Group | 1.09     | -0.68                                       | 2.86  | 0.89                   | 1.22     | .226     |

*Note.* *N* = 133. Model fit  $R^2 = .22$ ,  $F(8, 124) = 4.46$ ,  $p < .001$ . Group = binary variable (0 = refugee adolescents, 1 = first- and second-generation immigrant adolescents). RE = religiosity; PTE = CATS potentially traumatic events subscale.

<sup>a</sup> Percentile bootstrap confidence interval based on 10,000 resamples.

*Group-specific Differences regarding the Moderation Effect of Intrinsic Religiosity and Religious Activity on the Relationship between Potentially Traumatic Events and Internalizing Symptoms*

| Predictor/ Model               | <i>b</i> | CI <sub>95%</sub> for <i>b</i> <sup>a</sup> |       | <i>SE</i> <sup>a</sup> | <i>t</i> | <i>p</i> |
|--------------------------------|----------|---------------------------------------------|-------|------------------------|----------|----------|
|                                |          | Lower                                       | Upper |                        |          |          |
| Model 1: Intrinsic Religiosity |          |                                             |       |                        |          |          |
| Age                            | -0.09    | -1.38                                       | 1.20  | 0.65                   | -0.14    | .890     |
| IR                             | -2.04    | -3.80                                       | -0.28 | 0.89                   | -2.30    | .023     |
| PTE                            | 1.78     | 1.03                                        | 2.53  | 0.38                   | 4.71     | < .001   |
| Group                          | -0.70    | -5.37                                       | 3.98  | 2.36                   | -0.30    | .768     |
| PTE x IR                       | -0.12    | -0.68                                       | 0.44  | 0.28                   | -0.43    | .669     |
| PTE x Group                    | 1.03     | -0.49                                       | 2.55  | 0.77                   | 1.35     | .181     |
| IR x Group                     | 0.17     | -3.28                                       | 3.63  | 1.75                   | 0.10     | .920     |
| PTE x IR x Group               | 0.10     | -1.03                                       | 1.23  | 0.57                   | 0.18     | .858     |
| Model 2: Religious Activity    |          |                                             |       |                        |          |          |
| Age                            | -0.29    | -1.57                                       | 0.99  | 0.65                   | -0.44    | .659     |
| RelAct                         | -1.48    | -2.92                                       | -0.03 | 0.73                   | -2.02    | .045     |
| PTE                            | 2.06     | 1.32                                        | 2.81  | 0.38                   | 5.46     | < .001   |
| Group                          | -0.56    | -5.17                                       | 4.05  | 2.33                   | -0.24    | .810     |
| PTE x RelAct                   | 0.06     | -0.40                                       | 0.52  | 0.23                   | 0.26     | .795     |
| PTE x Group                    | 1.36     | -0.17                                       | 2.89  | 0.77                   | 1.76     | .081     |
| RelAct x Group                 | 0.65     | -2.25                                       | 3.55  | 1.46                   | 0.44     | .657     |
| PTE x RelAct x Group           | 0.98     | 0.02                                        | 1.94  | 0.48                   | 2.02     | .045     |

*Note.*  $N = 133$ ; Fit for Model 1:  $R^2 = .21$ ,  $F(8, 124) = 4.04$ ,  $p < .001$ ; fit for Model 2:  $R^2 = .22$ ,  $F(8, 124) = 4.49$ ,  $p < .001$ . Group = binary variable (0 = refugee adolescents,  $n_{RA} = 74$ ; 1 = first- and second-generation immigrant adolescents,  $n_{IA} = 59$ ); IR = DUREL intrinsic religiosity subscale; RelAct = religious activity (combined DUREL ORA/ NORA subscales); PTE = CATS potentially traumatic events subscale.

<sup>a</sup> Percentile bootstrap confidence interval based on 10,000 resamples.

**3. Table E3**

*Refugee Group-specific Differences regarding the Moderation Effect of Religiosity on the Relationship between Potentially Traumatic Events and Internalizing Symptoms*

| Predictor        | <i>b</i> | CI <sub>95%</sub> for <i>b</i> <sup>a</sup> |       | <i>SE</i> <sup>a</sup> | <i>t</i> | <i>p</i> |
|------------------|----------|---------------------------------------------|-------|------------------------|----------|----------|
|                  |          | Lower                                       | Upper |                        |          |          |
| Age              | -1.32    | -3.18                                       | 0.56  | 0.93                   | -1.40    | .166     |
| Length of Stay   | -0.71    | -3.19                                       | 1.56  | 1.13                   | -0.63    | .534     |
| RE               | -4.08    | -8.09                                       | -0.06 | 2.01                   | -2.03    | .046     |
| PTE              | 1.42     | 0.54                                        | 2.30  | 0.44                   | 3.23     | .002     |
| Group            | 8.80     | 2.72                                        | 14.89 | 3.04                   | 2.90     | .005     |
| PTE x RE         | -0.99    | -2.32                                       | 0.34  | 0.67                   | -1.50    | .140     |
| PTE x Group      | -1.60    | -3.38                                       | 0.18  | 0.89                   | -1.79    | .078     |
| RE x Group       | 7.15     | -0.87                                       | 15.18 | 4.01                   | 1.78     | .079     |
| PTE x RE x Group | -0.33    | -2.95                                       | 2.29  | 1.31                   | -0.25    | .802     |

*Note.*  $N = 74$ ; fit for model  $R^2 = .35$ ,  $F(8, 65) = 4.39$ ,  $p < .001$ . Group = binary variable (0 = accompanied refugee adolescents,  $n_{\text{accompanied}} = 38$ ; 1 = unaccompanied refugee adolescents,  $n_{\text{unaccompanied}} = 36$ ); RE = religiosity (DUREL score); PTE = CATS potentially traumatic events subscale.

<sup>a</sup> Percentile bootstrap confidence interval based on 10,000 resamples.

#### 4. Figure E1

##### Group-specific Buffering Effect for Religious Activity among RA and IA

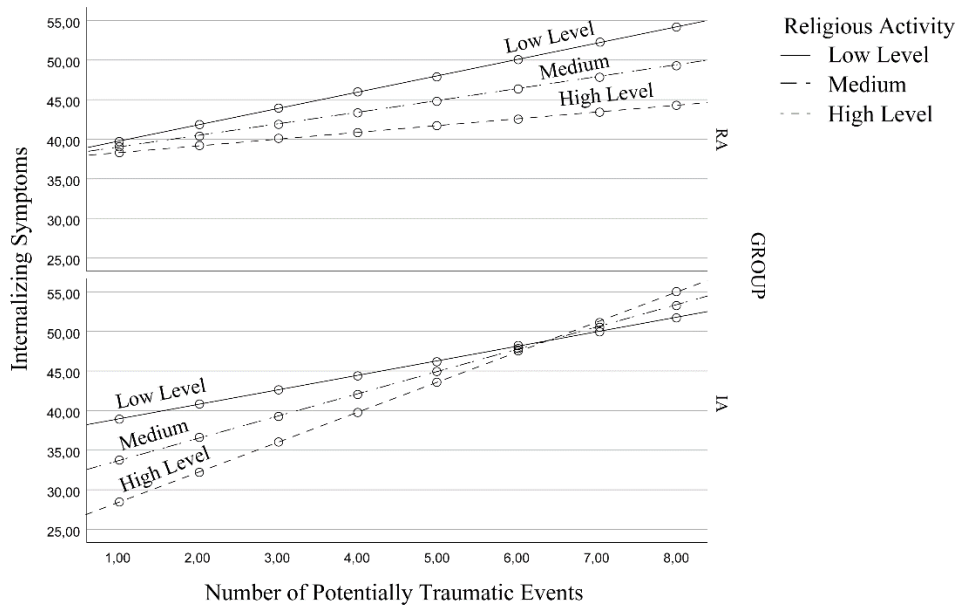

Note. RA = refugee adolescents ( $n_{RA} = 74$ ), IA = first- and second-generation immigrant adolescents ( $n_{IA} = 59$ ). Low Level = -1 SD (1.46), Medium = Mean (3.09), High Level = +1 SD (4.72).

#### 5. Figure E2

##### Significant Religion Domain-specific Mediation Analyses (Control Variable: Age)

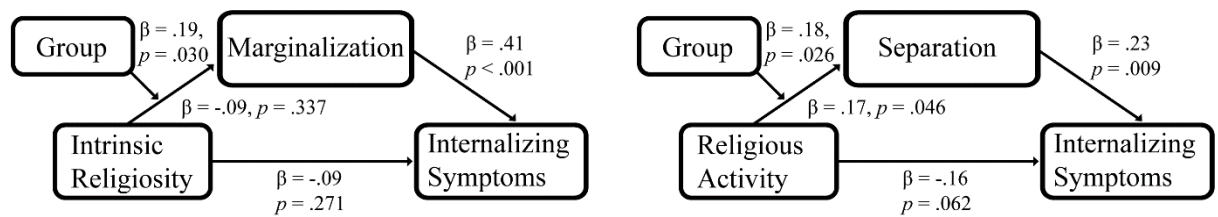

Note. CFI = .99; SRMR = .023. Conditional Indirect Effect for RA:  $b = -1.01, p = .029$ ; for IA:  $b = 0.50, p = .242$ . Index of Moderated Mediation:  $b = 1.50, p = .011$ .

Note. CFI = .99; SRMR = .016. Conditional Indirect Effect for RA:  $b = 0.01, p = .978$ ; for IA:  $b = 0.75, p = .013$ . Index of Moderated Mediation:  $b = 0.74, p = .023$ .

## 6. Figure E3

*3D Surface Plot on the Relationship between Potentially Traumatic Events, Religiosity, and Internalizing Symptoms*

Please visit the following URL (see file *Animated\_3D\_Surface\_Plot.gif* in the OSF Storage):

<https://osf.io/n8pv9/>

## 7. Measurement Invariance

Measurement invariance among the groups was tested for the DUREL scale using IBM AMOS 27. For enabling multigroup CFA with small sample sizes and to improve test power, item parcels were previously built for the two single item subscales ORA and NORA by averaging them according Little et al. (2013), yielding four indicators to the latent factor overall religiosity. According to Chen (2007), measurement invariance on different levels is given when changes of both *CFI* and *RMSEA* move within the range of  $\Delta CFI \leq 0.01$  and  $\Delta RMSEA \leq 0.015$ .

Testing the configural invariance yielded values of *CFI* = 0.977 and *RMSEA* = .085, and  $\Delta CFI = .002$  and  $\Delta RMSEA = -.027$  on metric invariance level,  $\Delta CFI = .068$  and  $\Delta RMSEA = .054$  on scalar invariance level. This suggests that measurement invariance is present at least at the metric level between the groups.

## Literature

Chen, F. F. (2007). Sensitivity of goodness of fit indexes to lack of measurement invariance. *Structural Equation Modeling: A Multidisciplinary Journal*, 14(3), 464-504. <https://doi.org/10.1080/10705510701301834>.

Little, T. D., Rhemtulla, M., Gibson, K., & Schoemann, A. M. (2013). Why the items versus parcels controversy needn't be one. *Psychological methods*, 18(3), 285. <https://psycnet.apa.org/doi/10.1037/a0033266>.
